# Supplementary material for: Enzymatic reaction modulation of G-quadruplex formation for the sensitive homogeneous fluorescence sensing of cholinesterase and organophosphate pesticides
Source: Royal Society of Chemistry journal article supplement (doi:10.1039/c8ay01996g), 2019-01-01
Supplement: c8ay01996g1.pdf [file c8ay01996g1.pdf]

## Supporting Information

### **Enzymatic reaction modulation of G-quadruplex formation for the sensitive homogeneous fluorescence sensing of cholinesterase and organophosphate pesticides**

Xin Yuan<sup>a</sup>, Sujuan Chen<sup>b</sup>, Shan Li<sup>b</sup>, Qiuyun Liu<sup>b</sup>, Mengqian Kou<sup>b</sup>, Ting Xu<sup>b</sup>, Hong  
Luo<sup>b\*</sup>, Ke Huang<sup>b\*</sup>, Mei Zhang<sup>a</sup>

<sup>a</sup> *College of Pharmacy, Chengdu University of Traditional Chinese Medicine,  
Chengdu, Sichuan, 611137, China*

<sup>b</sup> *College of Chemistry and Material Science, Sichuan Normal University, Chengdu,  
Sichuan, 610068, China*

\*Corresponding authors.

*E-mail address:* huangke@sicnu.edu.cn (K. Huang);

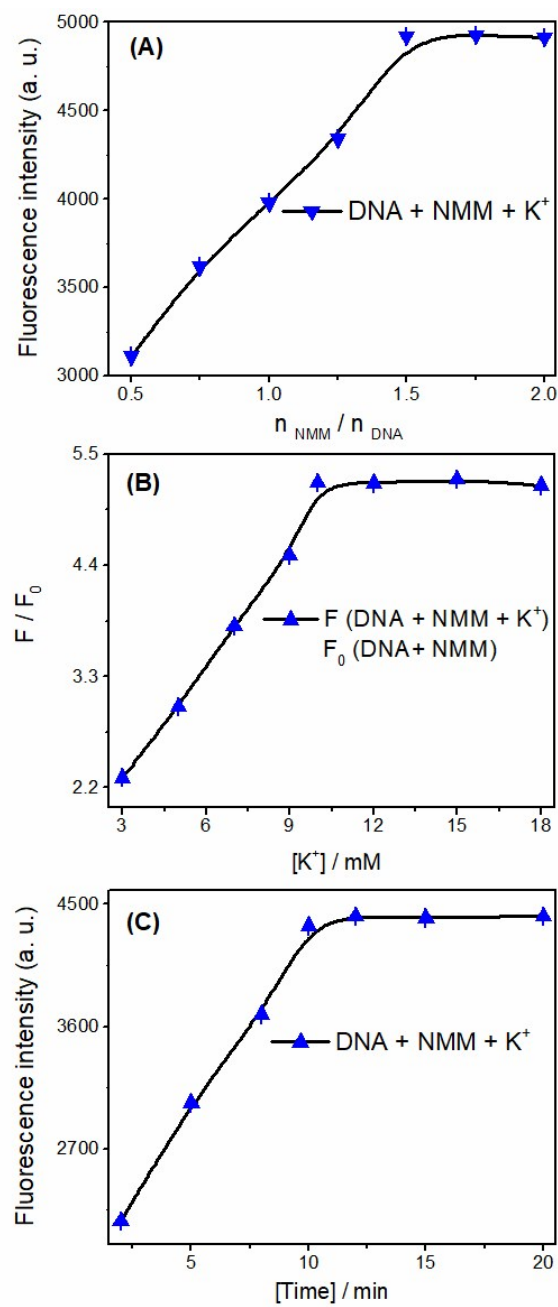

**Fig. S1.** Effect of the formation of the G-quadruplex. (A) The ratio of NMM and probe DNA, (B) the concentration of K<sup>+</sup>, and (C) the reaction time between probe DNA and NMM.

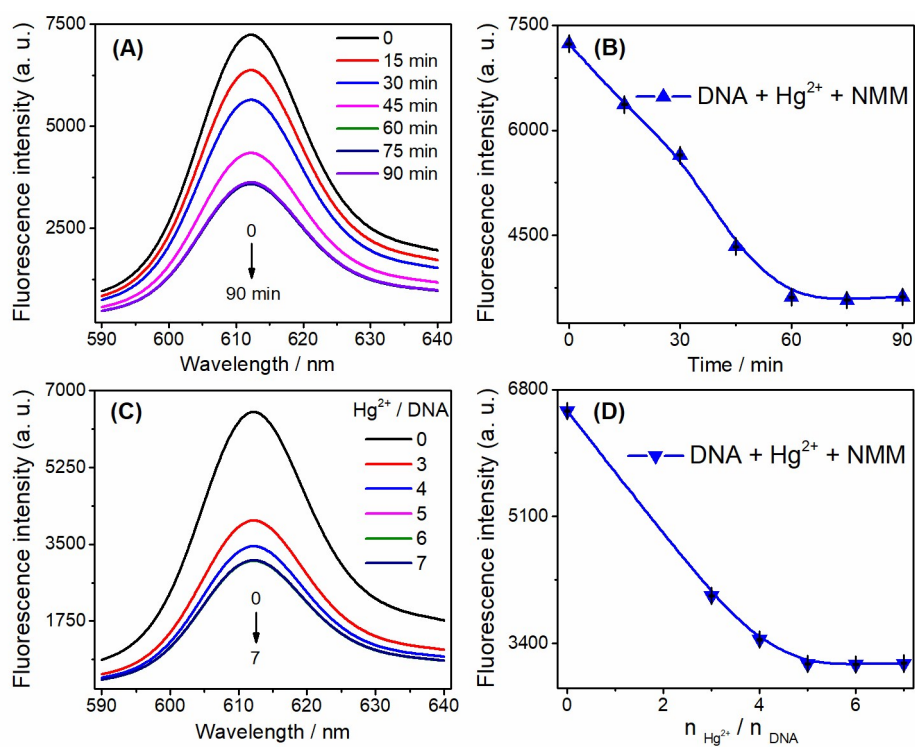

**Fig. S2.** Effect of the formation of the T-Hg<sup>2+</sup>-T hairpin structure. (A) and (B) Reaction time between the probe DNA with Hg<sup>2+</sup>; (C) and (D) the ratio of Hg<sup>2+</sup> and probe DNA.

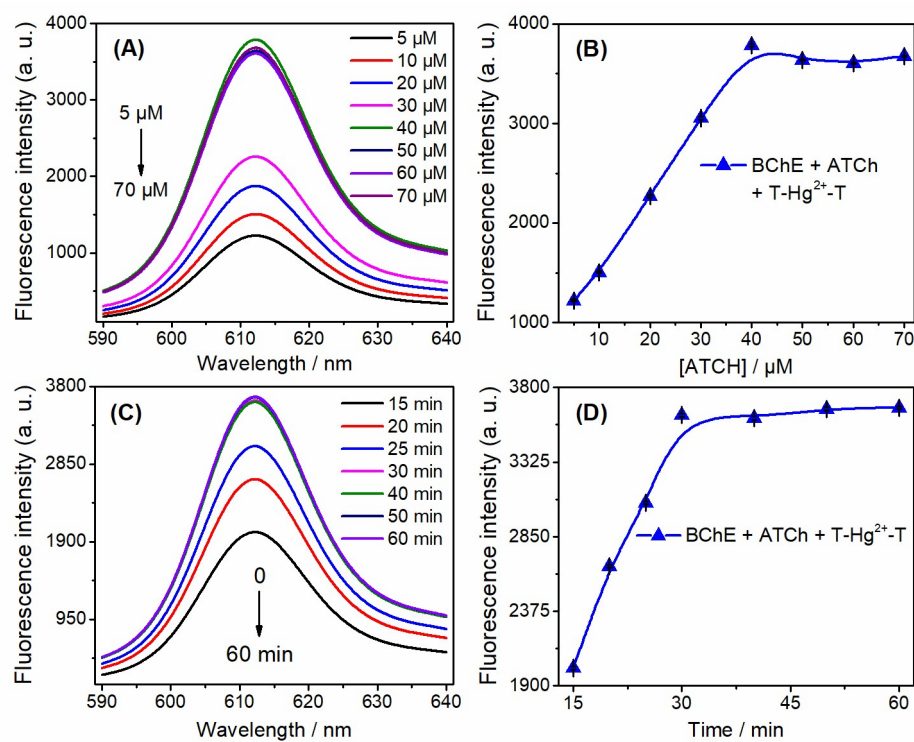

**Fig. S3.** Effect of the concentration of ATCh (A) and (B), and the enzymatic hydrolysis time between BChE and ATCh (C) and (D).

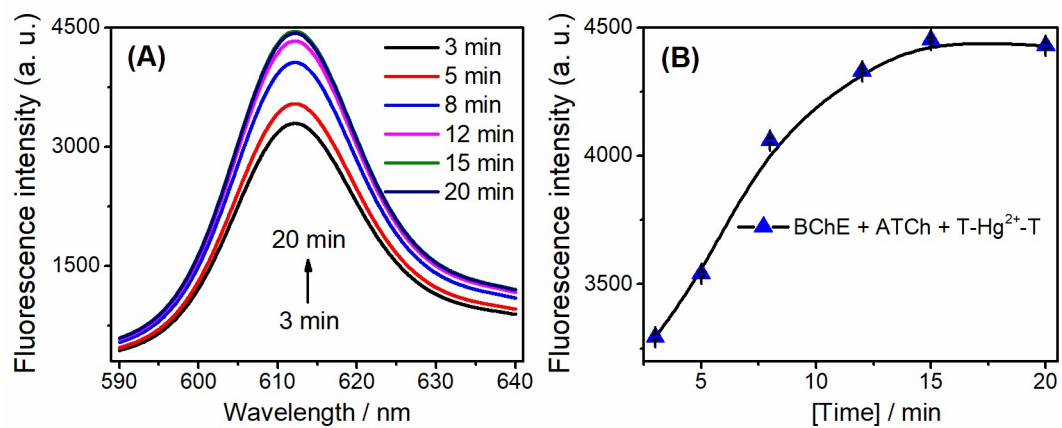

**Fig. S4.** Competitive reaction time between TCh (hydrolysate of ATCh) and the T-Hg<sup>2+</sup>-T hairpin structure.
